# Supplementary material for: Medicina de la adolescencia: atención integral
Source: MDPI journal article supplement (doi:10.3390/molecules28217326), 2004-01-01
Supplement: s1 [file s1]

Article

# Synergistic Remediation of Organic Dye by Titanium Dioxide/Reduced Graphene Oxide Nanocomposite

Martina Kocijan <sup>1,\*</sup>, Lidija Ćurković <sup>1,\*</sup>, Damjan Vengust <sup>2</sup>, Tina Radošević <sup>3</sup>, Vasyi Shvalya <sup>4</sup>, Gil Gonçalves <sup>5,6</sup> and Matejka Podlogar <sup>3</sup>

<sup>1</sup> Department of Materials, Faculty of Mechanical Engineering and Naval Architecture, University of Zagreb, Ivana Lučića 5, 10000 Zagreb, Croatia

<sup>2</sup> Advanced Materials Department, Jožef Stefan Institute, Jamova Cesta 39, SI-1000 Ljubljana, Slovenia; damjan.vengust@ijs.si

<sup>3</sup> Department for Nanostructured Materials, Jožef Stefan Institute, Jamova Cesta 39, SI-1000 Ljubljana, Slovenia; tina.radosevic@ijs.si (T.R.); matejka.podlogar@ijs.si (M.P.)

<sup>4</sup> Department of Gaseous Electronics, Jožef Stefan Institute, SI-1000 Ljubljana, Slovenia; vasyi.shvalya@ijs.si

<sup>5</sup> Centre for Mechanical Technology and Automation (TEMA), Mechanical Engineering Department, University of Aveiro, 3810-193 Aveiro, Portugal; ggoncalves@ua.pt

<sup>6</sup> Intelligent Systems Associate Laboratory (LASI), 4800-058 Guimarães, Portugal

\* Correspondence: martina.kocijan@fsb.hr (M.K.); lidija.curkovic@fsb.hr (L.Ć.)

## Supplementary Materials

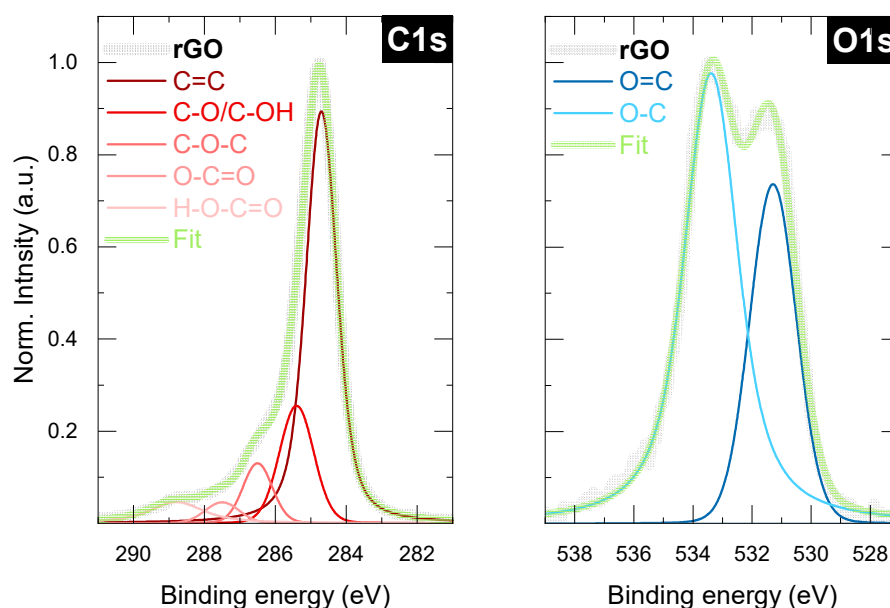

Figure S1. Deconvoluted C1s and O1s XPS spectra of rGO.

**Table S1.** Deconvoluted peak area for Ti2p and O1s peaks.

| Sample                       | Area (Ti2p <sub>3/2</sub> ) | Area (Ti2p <sub>1/2</sub> ) | Area (O <sup>2-</sup> ) | Area (OH) |
|------------------------------|-----------------------------|-----------------------------|-------------------------|-----------|
| rGO                          | /                           | /                           | /                       | /         |
| TiO <sub>2</sub>             | 1.44                        | 0.58                        | 1.49                    | 0.28      |
| TiO <sub>2</sub> @rGO_4 wt%  | 1.41                        | 0.59                        | 1.48                    | 0.29      |
| TiO <sub>2</sub> @rGO_8 wt%  | 1.42                        | 0.59                        | 1.49                    | 0.29      |
| TiO <sub>2</sub> @rGO_16 wt% | 1.41                        | 0.59                        | 1.50                    | 0.28      |

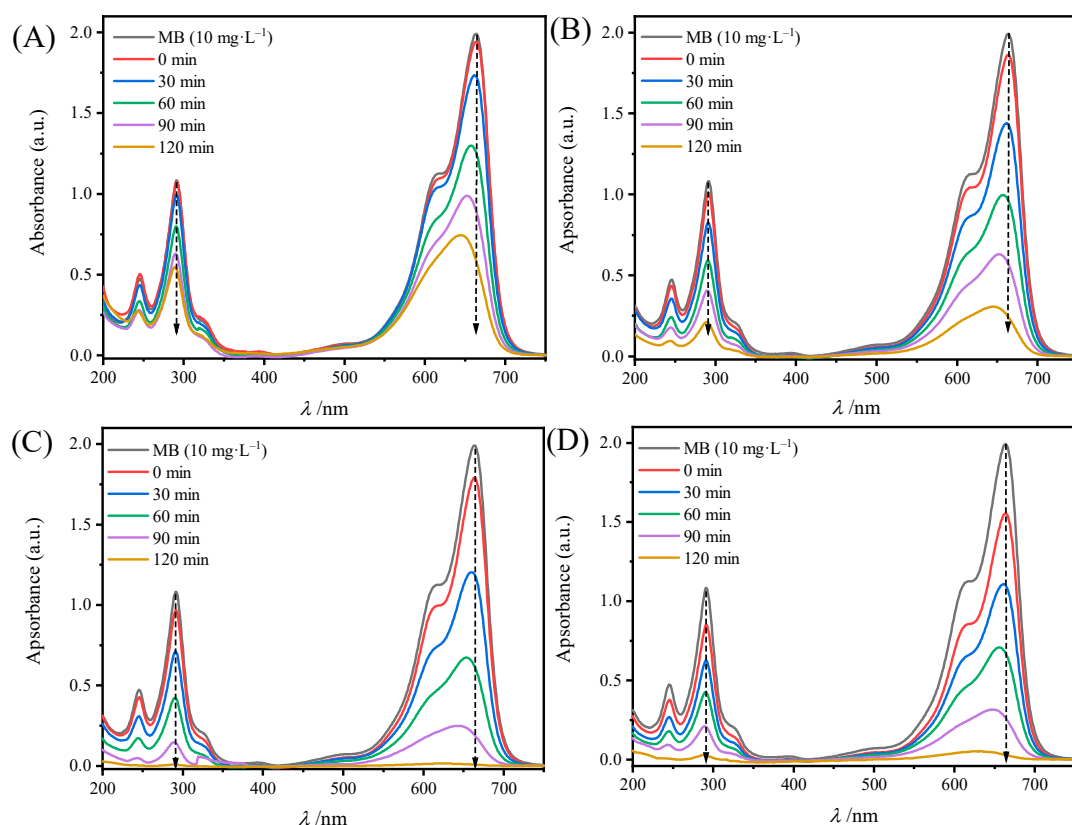

**Figure S2.** UV-Vis spectra of methylene blue dye decomposition in the time period of 0, 30, 60, 90 and 120 min under reaction conditions:  $\gamma$ (methylene blue)=10 mg·L<sup>-1</sup>,  $V$ (solution)=30 mL,  $m$ (photocatalyst)=15 mg,  $T$ =22±0.5 °C, simulated Solar radiation, with the use of photocatalysts (A) TiO<sub>2</sub>, (B) TiO<sub>2</sub>@rGO\_4 wt%, (C) TiO<sub>2</sub>@rGO\_8 wt% and (D) TiO<sub>2</sub>@rGO\_16 wt%.

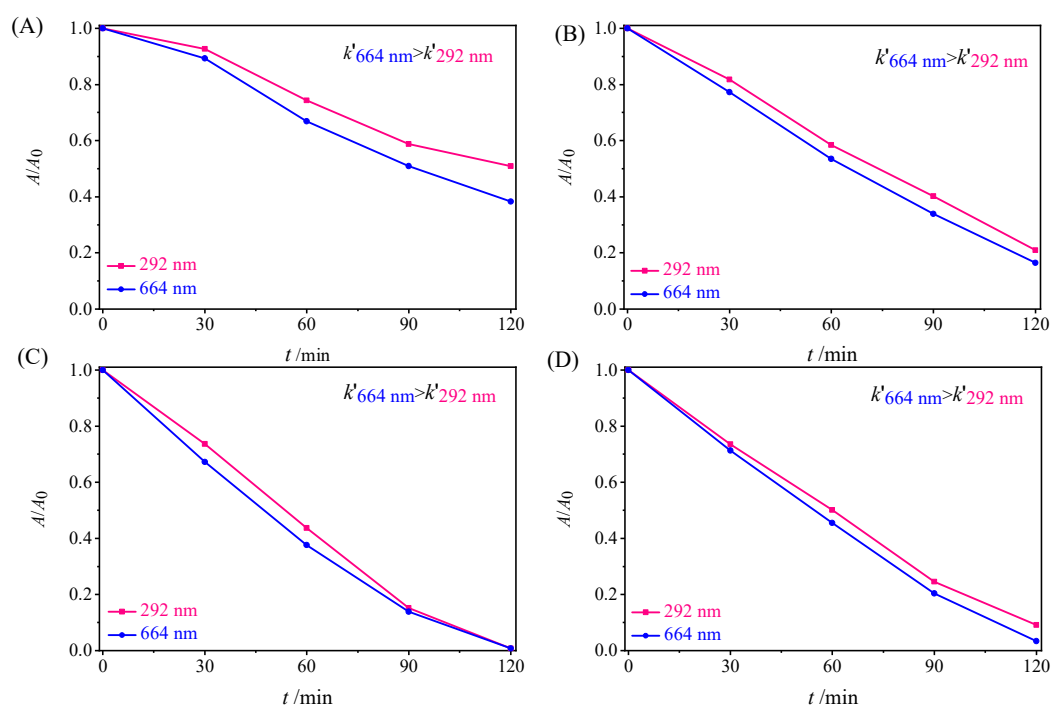

**Figure S3.** Change in the relative absorbance of methylene blue (aromaticity at 292 nm and decolourisation at 664 nm) depending on the time of photocatalytic degradation using (A)  $\text{TiO}_2$ , (B)  $\text{TiO}_2@\text{rGO}_4$  wt%, (C)  $\text{TiO}_2@\text{rGO}_8$  wt% and (D)  $\text{TiO}_2@\text{rGO}_{16}$  wt% with simulated Solar radiation.

**Table S2.** Values of photocatalytic degradation efficiency ( $\eta$ ), pseudo first-order reaction rate ( $k'$ ) and associated determination coefficient values ( $R^2$ ) of the methylene blue dye decomposition process for a catalyst concentration of  $0.5 \text{ g}\cdot\text{L}^{-1}$  at a temperature of  $22\pm 0.5^\circ\text{C}$ , with simulated Solar radiation.

| Sample                             | $\eta_{292}$ (after 120 min), % | $k'_{292}$ (after 90 min), $\times 10^{-3}, \text{min}^{-1}$ | $R^2$   | $\eta_{664}$ (after 120 min), % | $k'_{664}$ (after 90 min), $\times 10^{-3}, \text{min}^{-1}$ | $R^2$   |
|------------------------------------|---------------------------------|--------------------------------------------------------------|---------|---------------------------------|--------------------------------------------------------------|---------|
| $\text{TiO}_2$                     | 49.14                           | 6.06                                                         | 0.95818 | 61.71                           | 7.73                                                         | 0.97021 |
| $\text{TiO}_2@\text{rGO}_4$ wt%    | 79.05                           | 10.23                                                        | 0.98376 | 83.35                           | 12.05                                                        | 0.98486 |
| $\text{TiO}_2@\text{rGO}_8$ wt%    | 99.20                           | 20.55                                                        | 0.92958 | 99.20                           | 21.69                                                        | 0.95805 |
| $\text{TiO}_2@\text{rGO}_{16}$ wt% | 90.83                           | 15.30                                                        | 0.96026 | 96.60                           | 17.42                                                        | 0.95955 |

**Table S3.** Achieved adsorption of methylene blue from ultrapure water during ultrasonic homogenization (15 min) and stirring (60 min), and total adsorption for 0.1, 0.5 and 1 g·L<sup>-1</sup> after using photocatalyst TiO<sub>2</sub> and TiO<sub>2</sub>@GO nanocomposites.

| Sample                       | Adsorption (ultrasound-15 min), % | Adsorption (stirring-60 min), % | Total adsorption, % | Catalyst concentration, g·L <sup>-1</sup> |
|------------------------------|-----------------------------------|---------------------------------|---------------------|-------------------------------------------|
| TiO <sub>2</sub>             | 0.39                              | /                               | 0.39                | 0.1                                       |
| TiO <sub>2</sub> @rGO_4 wt%  | 1.70                              | /                               | 1.70                |                                           |
| TiO <sub>2</sub> @rGO_8 wt%  | 2.22                              | /                               | 2.22                |                                           |
| TiO <sub>2</sub> @rGO_16 wt% | 5.45                              | 2.82                            | 8.22                |                                           |
| TiO <sub>2</sub>             | 1.03                              | 1.36                            | 2.39                | 0.5                                       |
| TiO <sub>2</sub> @rGO_4 wt%  | 4.33                              | 2.21                            | 6.54                |                                           |
| TiO <sub>2</sub> @rGO_8 wt%  | 6.37                              | 3.93                            | 10.30               |                                           |
| TiO <sub>2</sub> @rGO_16 wt% | 14.76                             | 8.37                            | 23.13               |                                           |
| TiO <sub>2</sub>             | 1.41                              | 2.48                            | 3.89                | 1                                         |
| TiO <sub>2</sub> @rGO_4 wt%  | 11.01                             | 3.53                            | 11.54               |                                           |
| TiO <sub>2</sub> @rGO_8 wt%  | 14.17                             | 6.03                            | 20.20               |                                           |
| TiO <sub>2</sub> @rGO_16 wt% | 34.31                             | 11.48                           | 45.79               |                                           |

**Table S4.** Values of photocatalytic degradation efficiency ( $\eta$ ), pseudo first-order reaction rate ( $k'$ ) and associated determination coefficient values ( $R^2$ ) of the methylene blue dye degradation process for a catalyst concentration of 0.1, 0.5, and 1 g·L<sup>-1</sup> at a temperature of 22±0.5 °C, with a simulated Solar lamp.

| Sample                       | $\eta$ (after 120 min), % | $k'$ (after 60 min) × 10 <sup>-3</sup> , min <sup>-1</sup> | $R^2$   | Catalyst concentration, g·L <sup>-1</sup> |
|------------------------------|---------------------------|------------------------------------------------------------|---------|-------------------------------------------|
| TiO <sub>2</sub>             | 33.52                     | 2.91                                                       | 0.99058 | 0.1                                       |
| TiO <sub>2</sub> @rGO_4 wt%  | 36.48                     | 3.50                                                       | 0.98754 |                                           |
| TiO <sub>2</sub> @rGO_8 wt%  | 44.51                     | 4.05                                                       | 0.99920 |                                           |
| TiO <sub>2</sub> @rGO_16 wt% | 44.08                     | 3.87                                                       | 0.98641 |                                           |
| TiO <sub>2</sub>             | 61.71                     | 6.84                                                       | 0.93168 | 0.5                                       |
| TiO <sub>2</sub> @rGO_4 wt%  | 83.35                     | 10.18                                                      | 0.96619 |                                           |
| TiO <sub>2</sub> @rGO_8 wt%  | 99.20                     | 16.30                                                      | 0.97628 |                                           |
| TiO <sub>2</sub> @rGO_16 wt% | 96.60                     | 12.78                                                      | 0.98542 |                                           |
| TiO <sub>2</sub>             | 72.86                     | 7.95                                                       | 0.95571 | 1                                         |
| TiO <sub>2</sub> @rGO_4 wt%  | 94.43                     | 10.70                                                      | 0.91211 |                                           |
| TiO <sub>2</sub> @rGO_8 wt%  | 99.82                     | 17.34                                                      | 0.93935 |                                           |
| TiO <sub>2</sub> @rGO_16 wt% | 99.31                     | 22.85                                                      | 0.92421 |                                           |

**Table S5.** Achieved adsorption of methylene blue from ultrapure water during ultrasonic homogenization (15 min) and stirring (60 min), and total adsorption for 5 and 15 mg·L<sup>-1</sup> initial concentrations of methylene blue pollutant.

| Sample                       | Adsorption<br>(ultrasound-15 min),<br>% | Adsorption<br>(stirring-60 min), % | Total adsorption,<br>% | Initial dye concentration,<br>mg·L <sup>-1</sup> |
|------------------------------|-----------------------------------------|------------------------------------|------------------------|--------------------------------------------------|
| TiO <sub>2</sub>             | 8.40                                    | 2.37                               | 10.77                  | 5                                                |
| TiO <sub>2</sub> @rGO_4 wt%  | 15.98                                   | 4.68                               | 20.66                  |                                                  |
| TiO <sub>2</sub> @rGO_8 wt%  | 19.59                                   | 6.47                               | 26.06                  |                                                  |
| TiO <sub>2</sub> @rGO_16 wt% | 23.95                                   | 12.94                              | 36.89                  |                                                  |
| TiO <sub>2</sub>             | 0.09                                    | 0.59                               | 0.68                   | 15                                               |
| TiO <sub>2</sub> @rGO_4 wt%  | 0.32                                    | 0.77                               | 1.09                   |                                                  |
| TiO <sub>2</sub> @rGO_8 wt%  | 1.89                                    | 1.62                               | 3.48                   |                                                  |
| TiO <sub>2</sub> @rGO_16 wt% | 5.79                                    | 3.33                               | 9.12                   |                                                  |

**Table S6.** Values of photocatalytic degradation efficiency ( $\eta$ ), pseudo first-order reaction rate ( $k'$ ) and associated determination coefficient values ( $R^2$ ) of methylene blue dye degradation process ( $C_0=5$  mg L<sup>-1</sup>,  $V=30$  mL,  $m(\text{catalyst})=15$  mg) at a temperature of 22±0.5 °C under simulated Solar lamp.

| Sample                       | $\eta$ (after 120 min),<br>% | $k'$ (after 60 min) $\times 10^{-3}$ ,<br>min <sup>-1</sup> | $R^2$   | Initial dye concentration,<br>mg·L <sup>-1</sup> |
|------------------------------|------------------------------|-------------------------------------------------------------|---------|--------------------------------------------------|
| TiO <sub>2</sub>             | 86.63                        | 11.93                                                       | 0.96318 | 5                                                |
| TiO <sub>2</sub> @rGO_4 wt%  | 99.82                        | 20.62                                                       | 0.91952 |                                                  |
| TiO <sub>2</sub> @rGO_8 wt%  | 99.91                        | 33.35                                                       | 0.94558 |                                                  |
| TiO <sub>2</sub> @rGO_16 wt% | 99.92                        | 40.71                                                       | 0.92569 |                                                  |
| TiO <sub>2</sub>             | 37.70                        | 3.41                                                        | 0.96494 | 15                                               |
| TiO <sub>2</sub> @rGO_4 wt%  | 60.75                        | 5.53                                                        | 0.95784 |                                                  |
| TiO <sub>2</sub> @rGO_8 wt%  | 67.95                        | 7.13                                                        | 0.96225 |                                                  |
| TiO <sub>2</sub> @rGO_16 wt% | 65.66                        | 6.15                                                        | 0.95977 |                                                  |

**Table S7.** Values of the efficiency of photolytic and photocatalytic degradation ( $\eta$ ), pseudo first-order reaction rate ( $k'$ ) and the corresponding value of the coefficient of determination ( $R^2$ ) of the methylene blue dye decomposition process ( $\gamma=10 \text{ mg L}^{-1}$ ,  $V=30 \text{ mL}$ ,  $m(\text{catalyst})=15 \text{ mg}$ ) at a temperature of  $22\pm0.5 \text{ }^\circ\text{C}$  with natural Sun radiation.

| Sample                       | $\eta(\text{after } 120 \text{ min}), \%$ | $k'(\text{after } 120 \text{ min}) \times 10^{-3}, \text{ min}^{-1}$ | $R^2$   |
|------------------------------|-------------------------------------------|----------------------------------------------------------------------|---------|
| Photolysis                   | 56.51                                     | 6.86                                                                 | 0.99772 |
| TiO <sub>2</sub>             | 82.34                                     | 14.43                                                                | 0.99474 |
| TiO <sub>2</sub> @rGO_4 wt%  | 97.12                                     | 29.10                                                                | 0.96235 |
| TiO <sub>2</sub> @rGO_8 wt%  | 93.60                                     | 22.69                                                                | 0.96743 |
| TiO <sub>2</sub> @rGO_16 wt% | 91.92                                     | 20.95                                                                | 0.97474 |

**Table S8.** Values of photocatalytic degradation efficiency ( $\eta$ ), pseudo first order reaction rate ( $k'$ ) and associated determination coefficient values ( $R^2$ ) of methylene blue dye degradation process for different water media, ( $\gamma=10 \text{ mg}\cdot\text{L}^{-1}$ ,  $V=30 \text{ mL}$ ,  $m(\text{catalyst})=15 \text{ mg}$  at a temperature of  $22\pm0.5 \text{ }^\circ\text{C}$ , with simulated Solar radiation.

| Water matrix    | $\eta(\text{after } 90 \text{ min}), \%$ | $k'(\text{after } 90 \text{ min}) \times 10^{-3}, \text{ min}^{-1}$ | $R^2$   |
|-----------------|------------------------------------------|---------------------------------------------------------------------|---------|
| photolysis      |                                          |                                                                     |         |
| Ultrapure water | 21.35                                    | 2.71                                                                | 0.99415 |
| Sea water       | 27.89                                    | 3.49                                                                | 0.98291 |
| Lake water      | 36.59                                    | 5.08                                                                | 0.97657 |
| River water     | 47.66                                    | 7.07                                                                | 0.98819 |
| Tap water       | 22.55                                    | 2.97                                                                | 0.98257 |
| photocatalysis  |                                          |                                                                     |         |
| Ultrapure water | 86.13                                    | 21.24                                                               | 0.94711 |
| Sea water       | 56.22                                    | 9.25                                                                | 0.97699 |
| Lake water      | 67.48                                    | 12.31                                                               | 0.97649 |
| River water     | 78.07                                    | 16.73                                                               | 0.98639 |
| Tap water       | 95.98                                    | 35.01                                                               | 0.98935 |
